# Supplementary material for: A Performance Analysis of Soil Dielectric Models over Organic Soils in Alaska for Passive Microwave Remote Sensing of Soil Moisture
Source: MDPI journal article supplement (doi:10.3390/rs15061658), 2023-03-19
Supplement: s1 [file s1]

# A Performance Analysis on Soil Dielectric Models over Organic Soils in Alaska for Passive Microwave Remote Sensing of Soil Moisture

Runze Zhang <sup>1,\*</sup>, Steven Chan <sup>2</sup>, Rajat Bindlish <sup>3</sup> and Venkataraman Lakshmi <sup>1</sup>

<sup>1</sup> Department of Engineering Systems and Environment, University of Virginia, Charlottesville, VA 22904, USA

<sup>2</sup> NASA Jet Propulsion Laboratory, California Institute of Technology, Pasadena, CA 91109, USA

<sup>3</sup> NASA Goddard Space Flight Center, Greenbelt, MD 20771, USA

\* Correspondence: rz4pd@virginia.edu

## 1. Supplementary Figures

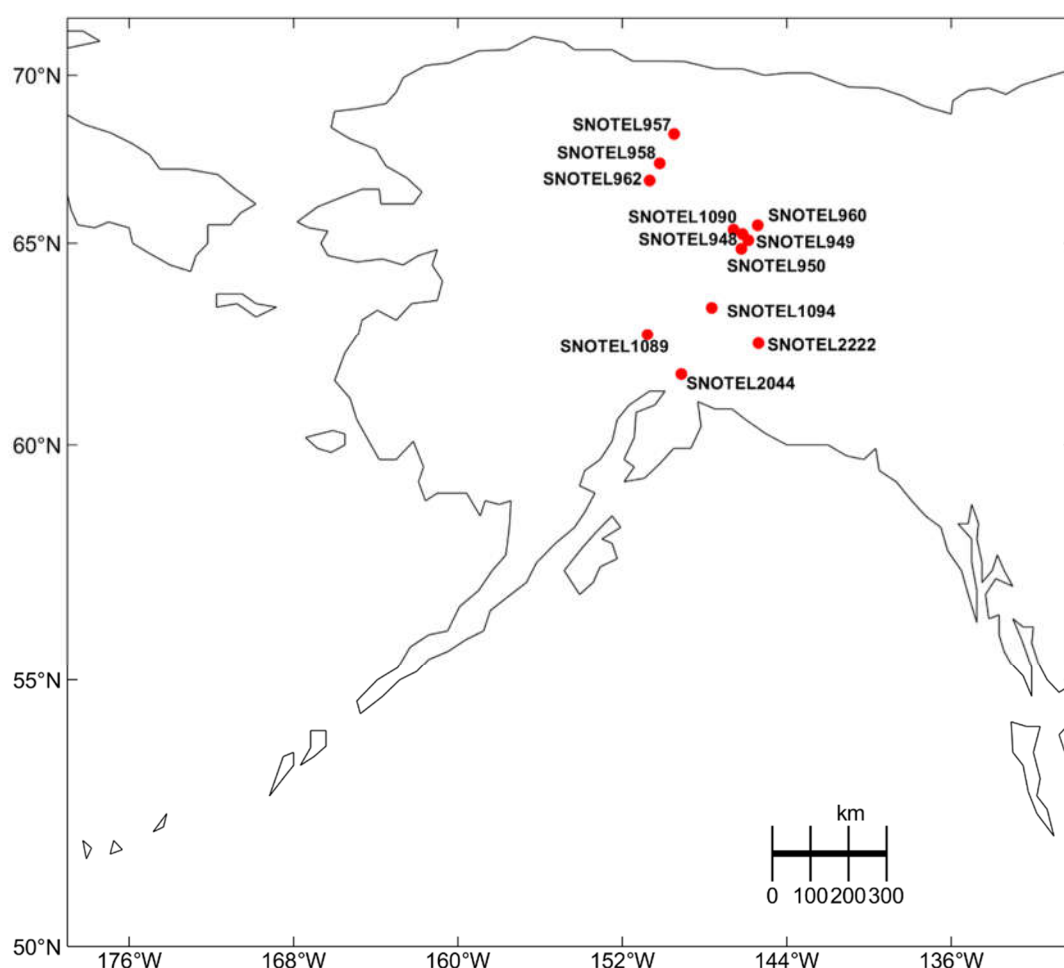

**Figure S1.** The geographical distributions of all the 12 stations finally used for validation.

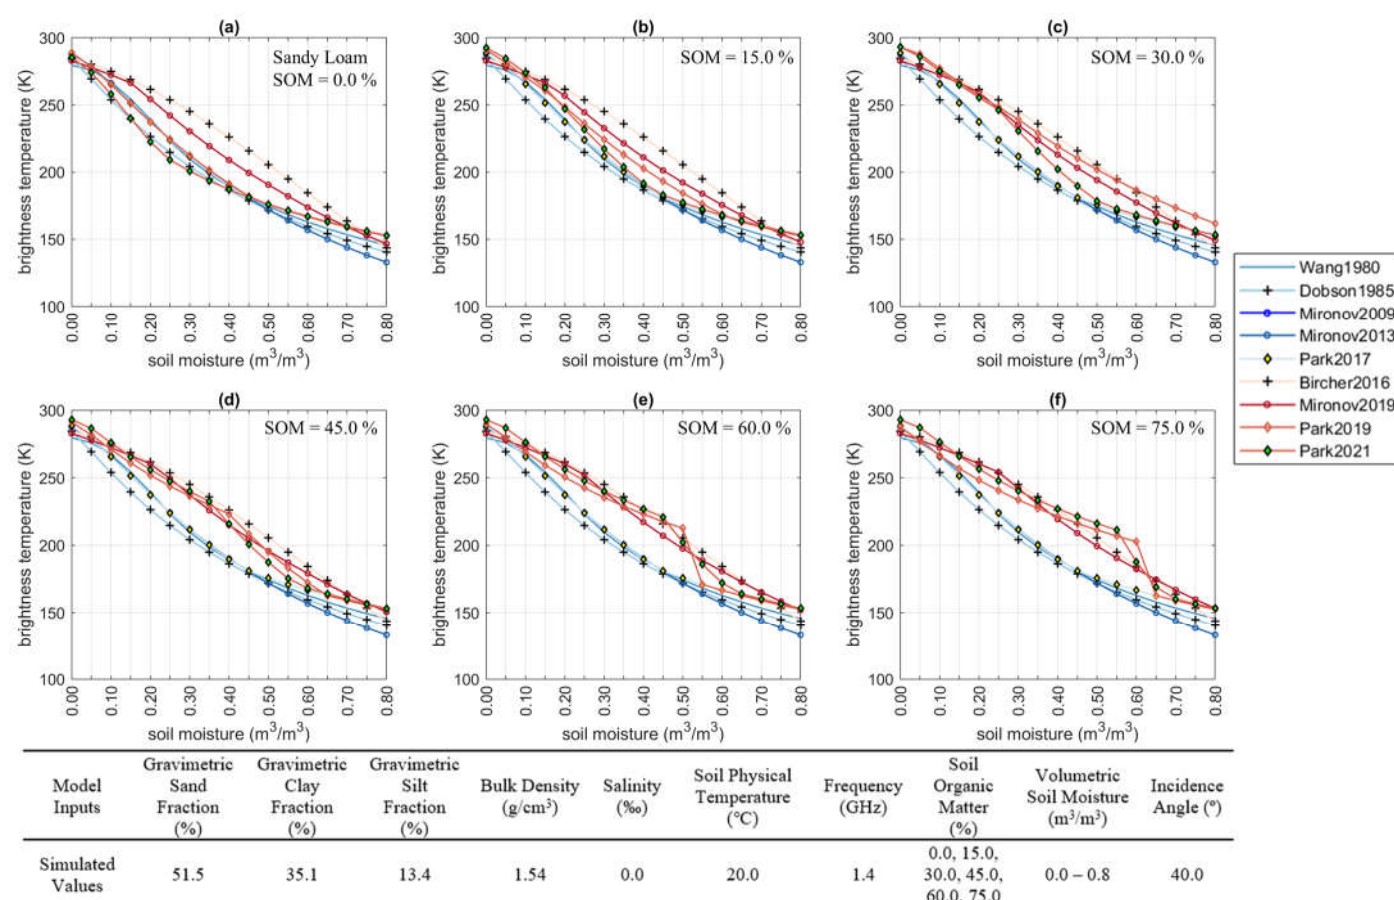

**Figure S2.** Simulated brightness temperature of a sandy loam with various soil organic matter, and the accompanied table displays all the input values where most of soil parameters are directly taken from the sample of sandy loam used in [1].

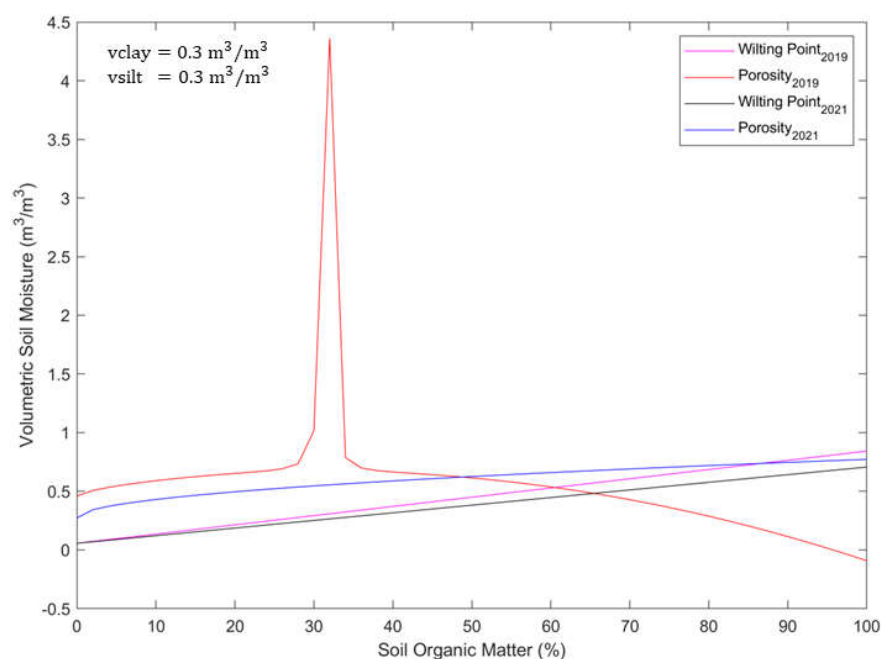

**Figure S3.** Variations of wilting point and porosity estimated from Park 2019 and Park 2021 with increasing soil organic matter with assumed volumetric textural compositions.

## 2. Supplementary Tables

**Table S1.** Detailed information of all in-situ stations investigated in this study.

| Index                                                                                                                                                                                                                                                                                                                                                                                                                         | Station Name        | Network | ID   | Latitude | Longitude | Available Source | Agreement        |
|-------------------------------------------------------------------------------------------------------------------------------------------------------------------------------------------------------------------------------------------------------------------------------------------------------------------------------------------------------------------------------------------------------------------------------|---------------------|---------|------|----------|-----------|------------------|------------------|
| <div></div> <div>Copyright: © 2023 by the authors. Licensee MDPI, Basel, Switzerland. This article is an open access article distributed under the terms and conditions of the Creative Commons Attribution (CC BY) license (<a href="https://creativecommons.org/licenses/by/4.0/">https://creativecommons.org/licenses/by/4.0/</a>).</div> |                     |         |      |          |           |                  |                  |
| 1                                                                                                                                                                                                                                                                                                                                                                                                                             | Anchor River Divide | SNOTEL  | 1062 | 59.86    | -151.32   | NWCC/ISMN        | /                |
| 2                                                                                                                                                                                                                                                                                                                                                                                                                             | Aniak               | SNOTEL  | 2065 | 61.58    | -159.58   | NWCC/ISMN        | Partially Agreed |
| 3                                                                                                                                                                                                                                                                                                                                                                                                                             | Atigun Pass         | SNOTEL  | 957  | 68.13    | -149.48   | NWCC/ISMN        | Partially Agreed |
| 4                                                                                                                                                                                                                                                                                                                                                                                                                             | Canyon Lake         | SCAN    | 1232 | 59.42    | -161.16   | NWCC/ISMN        | /                |
| 5                                                                                                                                                                                                                                                                                                                                                                                                                             | Checkers Creek      | SCAN    | 2213 | 65.40    | -164.71   | NWCC/ISMN        | /                |
| 6                                                                                                                                                                                                                                                                                                                                                                                                                             | Chisana             | SNOTEL  | 1093 | 62.07    | -142.05   | NWCC             | /                |
| 7                                                                                                                                                                                                                                                                                                                                                                                                                             | Coldfoot            | SNOTEL  | 958  | 67.25    | -150.18   | NWCC/ISMN        | Agreed           |
| 8                                                                                                                                                                                                                                                                                                                                                                                                                             | Eagle Summit        | SNOTEL  | 960  | 65.49    | -145.41   | NWCC/ISMN        | Agreed           |
| 9                                                                                                                                                                                                                                                                                                                                                                                                                             | Exit Glacier        | SNOTEL  | 1092 | 60.19    | -149.62   | NWCC/ISMN        | /                |
| 10                                                                                                                                                                                                                                                                                                                                                                                                                            | Fielding Lake       | SNOTEL  | 1268 | 63.20    | -145.63   | NWCC             | /                |
| 11                                                                                                                                                                                                                                                                                                                                                                                                                            | Galena AK           | SNOTEL  | 429  | 64.70    | -156.72   | NWCC             | /                |
| 12                                                                                                                                                                                                                                                                                                                                                                                                                            | Gobblers Knob       | SNOTEL  | 962  | 66.75    | -150.67   | NWCC/ISMN        | Agreed           |
| 13                                                                                                                                                                                                                                                                                                                                                                                                                            | Granite Crk         | SNOTEL  | 963  | 63.94    | -145.40   | NWCC/ISMN        | Agreed           |
| 14                                                                                                                                                                                                                                                                                                                                                                                                                            | Gulkana River       | SNOTEL  | 2222 | 62.41    | -145.38   | NWCC/ISMN        | Agreed           |
| 15                                                                                                                                                                                                                                                                                                                                                                                                                            | Imnaviat Creek      | SNOTEL  | 968  | 68.62    | -149.30   | NWCC/ISMN        | Agreed           |
| 16                                                                                                                                                                                                                                                                                                                                                                                                                            | Innoko Camp         | SCAN    | 2211 | 63.64    | -158.03   | NWCC/ISMN        | Disagreed        |
| 17                                                                                                                                                                                                                                                                                                                                                                                                                            | Jack Wade Jct       | SNOTEL  | 1275 | 64.15    | -141.33   | NWCC             | /                |
| 18                                                                                                                                                                                                                                                                                                                                                                                                                            | Kanaryagak Camp     | SCAN    | 2208 | 61.36    | -165.12   | NWCC/ISMN        | /                |
| 19                                                                                                                                                                                                                                                                                                                                                                                                                            | Kanut Lake          | SCAN    | 2212 | 66.18    | -151.74   | NWCC/ISMN        | /                |
| 20                                                                                                                                                                                                                                                                                                                                                                                                                            | Kelly Station       | SNOTEL  | 1175 | 67.93    | -162.28   | NWCC/ISMN        | /                |
| 21                                                                                                                                                                                                                                                                                                                                                                                                                            | Kenai Moose Pens    | SNOTEL  | 966  | 60.73    | -150.48   | NWCC/ISMN        | /                |
| 22                                                                                                                                                                                                                                                                                                                                                                                                                            | Little Chena Ridge  | SNOTEL  | 947  | 65.12    | -146.73   | NWCC/ISMN        | Agreed           |
| 23                                                                                                                                                                                                                                                                                                                                                                                                                            | Lower Mulchatna     | SNOTEL  | 1233 | 59.82    | -156.99   | NWCC/ISMN        | /                |
| 24                                                                                                                                                                                                                                                                                                                                                                                                                            | May Creek           | SNOTEL  | 1096 | 61.35    | -142.71   | NWCC             | /                |
| 25                                                                                                                                                                                                                                                                                                                                                                                                                            | McGrath             | SNOTEL  | 785  | 62.95    | -155.61   | NWCC             | /                |
| 26                                                                                                                                                                                                                                                                                                                                                                                                                            | Mcneil River SGS    | SNOTEL  | 1191 | 59.08    | -154.28   | NWCC/ISMN        | /                |
| 27                                                                                                                                                                                                                                                                                                                                                                                                                            | Monahan Flat        | SNOTEL  | 1094 | 63.31    | -147.65   | NWCC/ISMN        | Agreed           |
| 28                                                                                                                                                                                                                                                                                                                                                                                                                            | Monument Creek      | SNOTEL  | 949  | 65.18    | -145.87   | NWCC/ISMN        | Agreed           |
| 29                                                                                                                                                                                                                                                                                                                                                                                                                            | Moore Creek Bridge  | SNOTEL  | 1176 | 59.59    | -135.21   | NWCC/ISMN        | Agreed           |
| 30                                                                                                                                                                                                                                                                                                                                                                                                                            | Moose Inc           | SCAN    | 2062 | 59.68    | -151.37   | NWCC             | /                |
| 31                                                                                                                                                                                                                                                                                                                                                                                                                            | Mt. Ryan            | SNOTEL  | 948  | 65.25    | -146.15   | NWCC/ISMN        | Partially Agreed |
| 32                                                                                                                                                                                                                                                                                                                                                                                                                            | Munson Ridge        | SNOTEL  | 950  | 64.85    | -146.21   | NWCC/ISMN        | Agreed           |

|    |                     |        |      |       |         |           |                  |
|----|---------------------|--------|------|-------|---------|-----------|------------------|
| 33 | Naknek River        | SCAN   | 2209 | 58.67 | -156.57 | NWCC/ISMN | /                |
| 34 | Nenana              | SNOTEL | 2081 | 64.69 | -149.91 | NWCC/ISMN | Agreed           |
| 35 | Nuka Glacier        | SNOTEL | 1037 | 59.70 | -150.71 | NWCC/ISMN | /                |
| 36 | Port Graham         | SNOTEL | 987  | 59.35 | -151.85 | NWCC/ISMN | /                |
| 37 | Prudhoe Bay         | SNOTEL | 1177 | 70.27 | -148.57 | NWCC/ISMN | /                |
| 38 | Rocky Point         | SNOTEL | 973  | 64.53 | -163.42 | NWCC/ISMN | /                |
| 39 | Schor Garden        | SCAN   | 2063 | 59.68 | -151.38 | NWCC      | /                |
| 40 | Spring Creek        | SNOTEL | 2044 | 61.65 | -149.13 | NWCC/ISMN | Agreed           |
| 41 | Summit Creek        | SNOTEL | 955  | 60.62 | -149.53 | NWCC/ISMN | Agreed           |
| 42 | Susitna Valley High | SNOTEL | 967  | 62.13 | -150.04 | NWCC/ISMN | Agreed           |
| 43 | Telaquana Lake      | SNOTEL | 1266 | 60.98 | -153.92 | NWCC      | /                |
| 44 | Tok                 | SNOTEL | 2080 | 63.35 | -142.98 | NWCC/ISMN | Disagreed        |
| 45 | Tokositna Valley    | SNOTEL | 1089 | 62.63 | -150.78 | NWCC/ISMN | Partially Agreed |
| 46 | Unalakleet          | SCAN   | 2221 | 63.91 | -160.75 | NWCC/ISMN | /                |
| 47 | Upper Nome Creek    | SNOTEL | 1090 | 65.37 | -146.59 | NWCC/ISMN | Agreed           |
| 48 | Upper Tsaina River  | SNOTEL | 1055 | 61.19 | -145.65 | NWCC/ISMN | Agreed           |
| 49 | Weary Lake          | SCAN   | 1234 | 59.13 | -159.09 | NWCC/ISMN | /                |
| 50 | Hozatka Lake        | SNOTEL | 2210 | 65.20 | -156.64 | ISMN      | /                |
| 51 | Ikalukrok Creek     | SCAN   | /    | 68.08 | -163.00 | ISMN      | /                |
| 52 | Point_Mackenzie     | SNOTEL | 1002 | 61.39 | -150.03 | ISMN      | /                |

**Table S2.** Annual R values between soil moisture retrievals from various dielectric models and in-situ measurements and the SMAP vertically polarized brightness temperature.

| Dielectric Models |   | Mineral Soil Based Models |             |              |              |           | Organic Soil Based Models |               |           |           | Ground Measurements |
|-------------------|---|---------------------------|-------------|--------------|--------------|-----------|---------------------------|---------------|-----------|-----------|---------------------|
| Year              | N | Wang 1980                 | Dobson 1985 | Mironov 2009 | Mironov 2013 | Park 2017 | Bircher 2016              | Mironov 2019  | Park 2019 | Park 2021 | in-situ             |
| 2015              | 9 | -0.715                    | -0.691      | -0.716       | -0.711       | -0.700    | -0.715                    | <b>-0.780</b> | -0.711    | -0.709    | -0.591              |
| 2016              | 8 | -0.714                    | -0.689      | -0.714       | -0.711       | -0.701    | -0.713                    | <b>-0.779</b> | -0.711    | -0.704    | -0.502              |
| 2017              | 9 | -0.786                    | -0.763      | -0.786       | -0.783       | -0.774    | -0.786                    | <b>-0.841</b> | -0.784    | -0.785    | -0.438              |
| 2018              | 7 | -0.768                    | -0.744      | -0.768       | -0.766       | -0.756    | -0.769                    | <b>-0.830</b> | -0.768    | -0.763    | -0.782              |
| 2019              | 3 | -0.591                    | -0.553      | -0.590       | -0.588       | -0.573    | -0.590                    | <b>-0.695</b> | -0.586    | -0.583    | -0.373              |
| 2020              | 4 | -0.741                    | -0.722      | -0.741       | -0.733       | -0.725    | -0.740                    | <b>-0.775</b> | -0.734    | -0.725    | -0.472              |
| 2021              | 4 | -0.746                    | -0.721      | -0.745       | -0.740       | -0.730    | -0.747                    | <b>-0.800</b> | -0.745    | -0.737    | -0.744              |
| Mean              | / | -0.723                    | -0.698      | -0.723       | -0.719       | -0.709    | -0.723                    | <b>-0.786</b> | -0.720    | -0.715    | -0.557              |

where N represents the number of in-situ stations used for the last-column R values, and where the column of the number tagged by bold font represents the dielectric model with the highest negative correlations with the SMAP vertically polarized brightness temperature.

## References

- Hallikainen, M.T.; Ulaby, F.T.; Dobson, M.C.; El-Rayes, M.A.; Wu, L.-K. Microwave dielectric behavior of wet soil-part 1: Empirical models and experimental observations. *IEEE Transactions on Geoscience and Remote Sensing* **1985**, 25-34.

**Disclaimer/Publisher's Note:** The statements, opinions and data contained in all publications are solely those of the individual author(s) and contributor(s) and not of MDPI and/or the editor(s). MDPI and/or the editor(s) disclaim responsibility for any injury to people or property resulting from any ideas, methods, instructions or products referred to in the content.
